# Supplementary material for: Validation of the Malay version of the Diabetes Health Literacy Scale among Malaysian adults with type 2 diabetes mellitus
Source: PeerJ journal article supplement (doi:10.7717/peerj.19660), 2025-07-28
Supplement: English_version_of_Diabetes_Health_Literacy_Scale.pdf [file English_version_of_Diabetes_Health_Literacy_Scale.pdf]

### Diabetes Health Literacy Scale (English version) (Lee et al., 2018)

Please read each of the following items and mark √ in the space that most closely indicates how much you agree with it (note that there is no correct answer for any of the items).

| No | Item                                                                                                          | Not really | Slightly | Moderately | Quite a lot | Very much |
|----|---------------------------------------------------------------------------------------------------------------|------------|----------|------------|-------------|-----------|
| 1  | I can read and understand the educational materials and booklets on diabetes.                                 |            |          |            |             |           |
| 2  | I understand the written information provided at an appointment for diabetes treatment or an examination.     |            |          |            |             |           |
| 3  | I comprehend the information I sought on diabetes.                                                            |            |          |            |             |           |
| 4  | I understand the information on diabetes management provided by the health-care provider.                     |            |          |            |             |           |
| 5  | I can judge if diabetes-related information is reliable.                                                      |            |          |            |             |           |
| 6  | I can print out my prescription from an automated prescription machine at the hospital.                       |            |          |            |             |           |
| 7  | When a change occurs in my personal schedule, I can alter the appointment date or time for a medical checkup. |            |          |            |             |           |
| 8  | I can calculate the next time to take diabetes medication.                                                    |            |          |            |             |           |
| 9  | I can determine the carbohydrate content per serving from the nutrition label on food packaging.              |            |          |            |             |           |
| 10 | I can interpret if my blood-glucose level is within the normal range.                                         |            |          |            |             |           |
| 11 | I can understand information on diabetes presented as probabilities, ratios, or on graphs.                    |            |          |            |             |           |
| 12 | When I have a question about diabetes, I usually ask a health-care provider.                                  |            |          |            |             |           |
| 13 | I can explain my diabetes condition to a health-care provider.                                                |            |          |            |             |           |
| 14 | When eating out with colleagues or friends, I can convey the reason why I should have a diabetic diet.        |            |          |            |             |           |
